# Supplementary material for: Marine waste upcycling—recovery of nylon monomers from fishing net waste using seashell waste-derived catalysts in a CO2-mediated thermocatalytic process
Source: Royal Society of Chemistry journal article supplement (doi:10.1039/d2ta02060b), 2022-01-01
Supplement: d2ta02060b1.pdf [file d2ta02060b1.pdf]

## Supplementary Materials for

# **Marine waste upcycling—recovery of nylon monomer from fishing net waste using seashell waste-derived catalysts in a CO<sub>2</sub>-mediated thermocatalytic process**

Soosan Kim <sup>a</sup>, Yong Tae Kim <sup>b</sup>, Lee Seul Oh <sup>b</sup>, Hyung Ju Kim <sup>b,\*</sup>, and Jechan Lee <sup>c,\*</sup>

<sup>a</sup> Department of Environmental Engineering, Ajou University, Suwon 16499, Republic of Korea

<sup>b</sup> Chemical & Process Technology Division, Korea Research Institute of Chemical Technology, Daejeon 34114, Republic of Korea

<sup>c</sup> School of Civil, Architectural Engineering, and Landscape Architecture & Department of Global Smart City, Sungkyunkwan University (SKKU), Suwon 16419, Republic of Korea

\*Corresponding author. E-mail address: [hjkim@kriict.re.kr](mailto:hjkim@kriict.re.kr) (H.J.K.); [jechanlee@skku.edu](mailto:jechanlee@skku.edu) (J.L.)

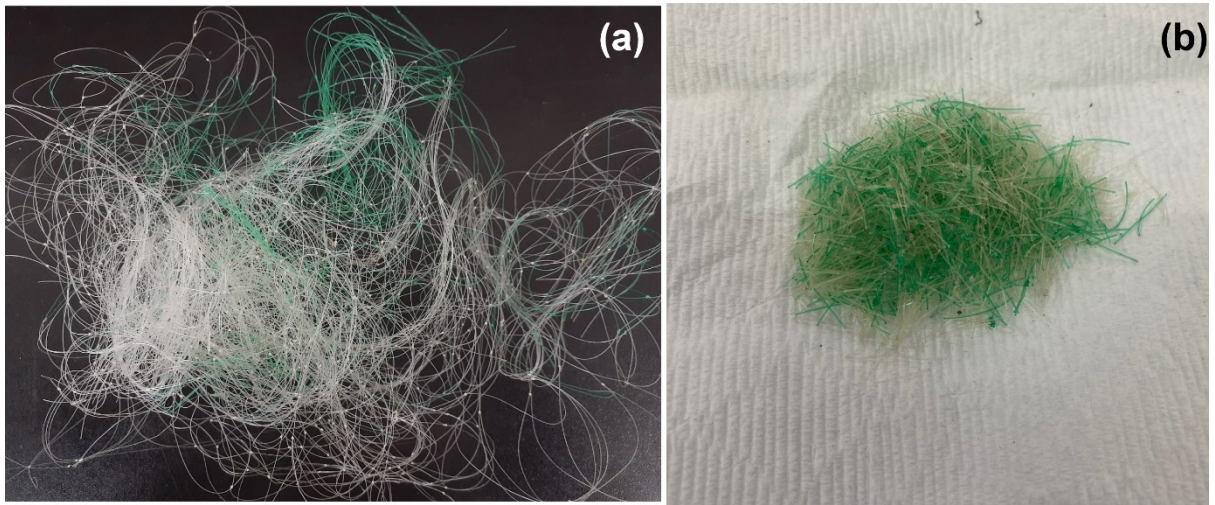

**Figure S1.** Ghost net used as the feedstock in this study: (a) before cutting and (b) after cutting.

(a) *in situ* catalytic reactor setup

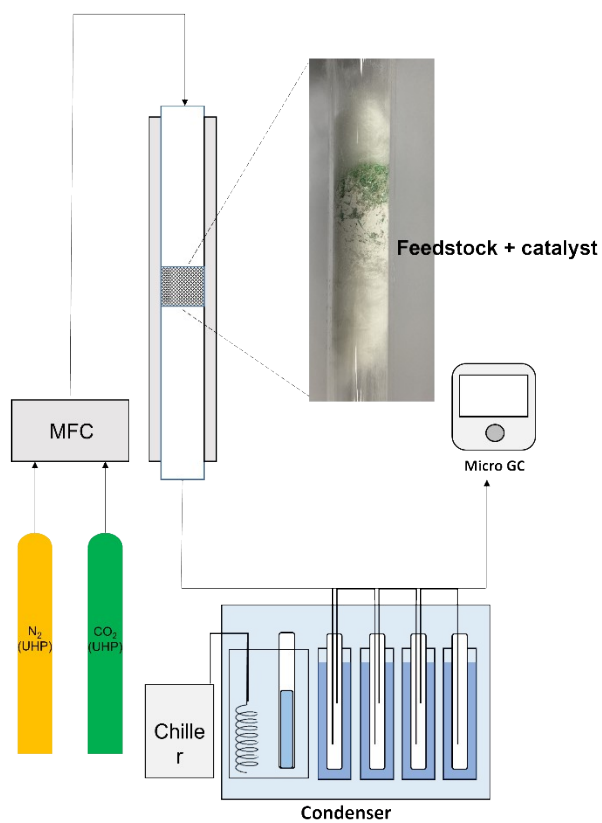

(b) *ex situ* catalytic reactor setup

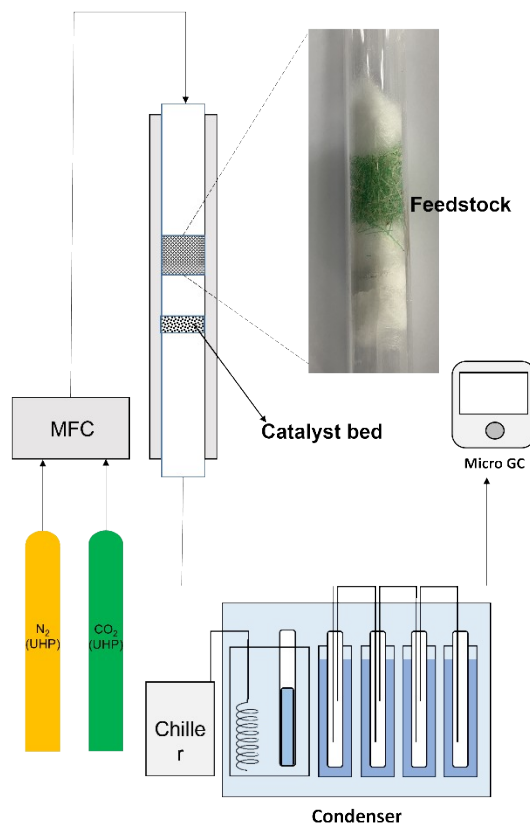

**Figure S2.** Schematic diagram of (a) *in situ* catalytic reactor setup and (b) *ex situ* catalytic reactor setup used for thermocatalytic conversion of the ghost net feedstock.

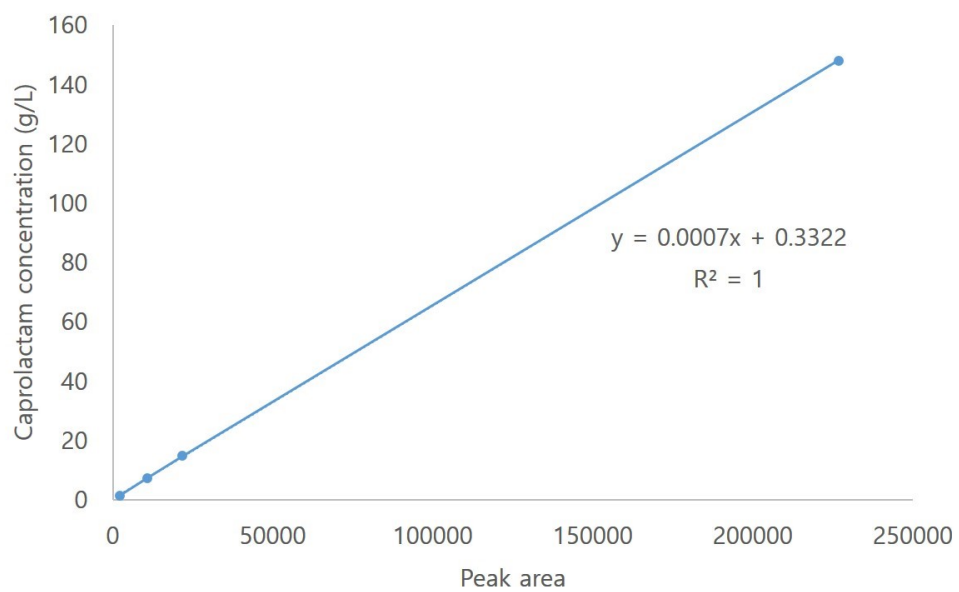

**Figure S3.** Four-point calibration curve used to quantify caprolactam in the pyrolytic product using a GC-FID.

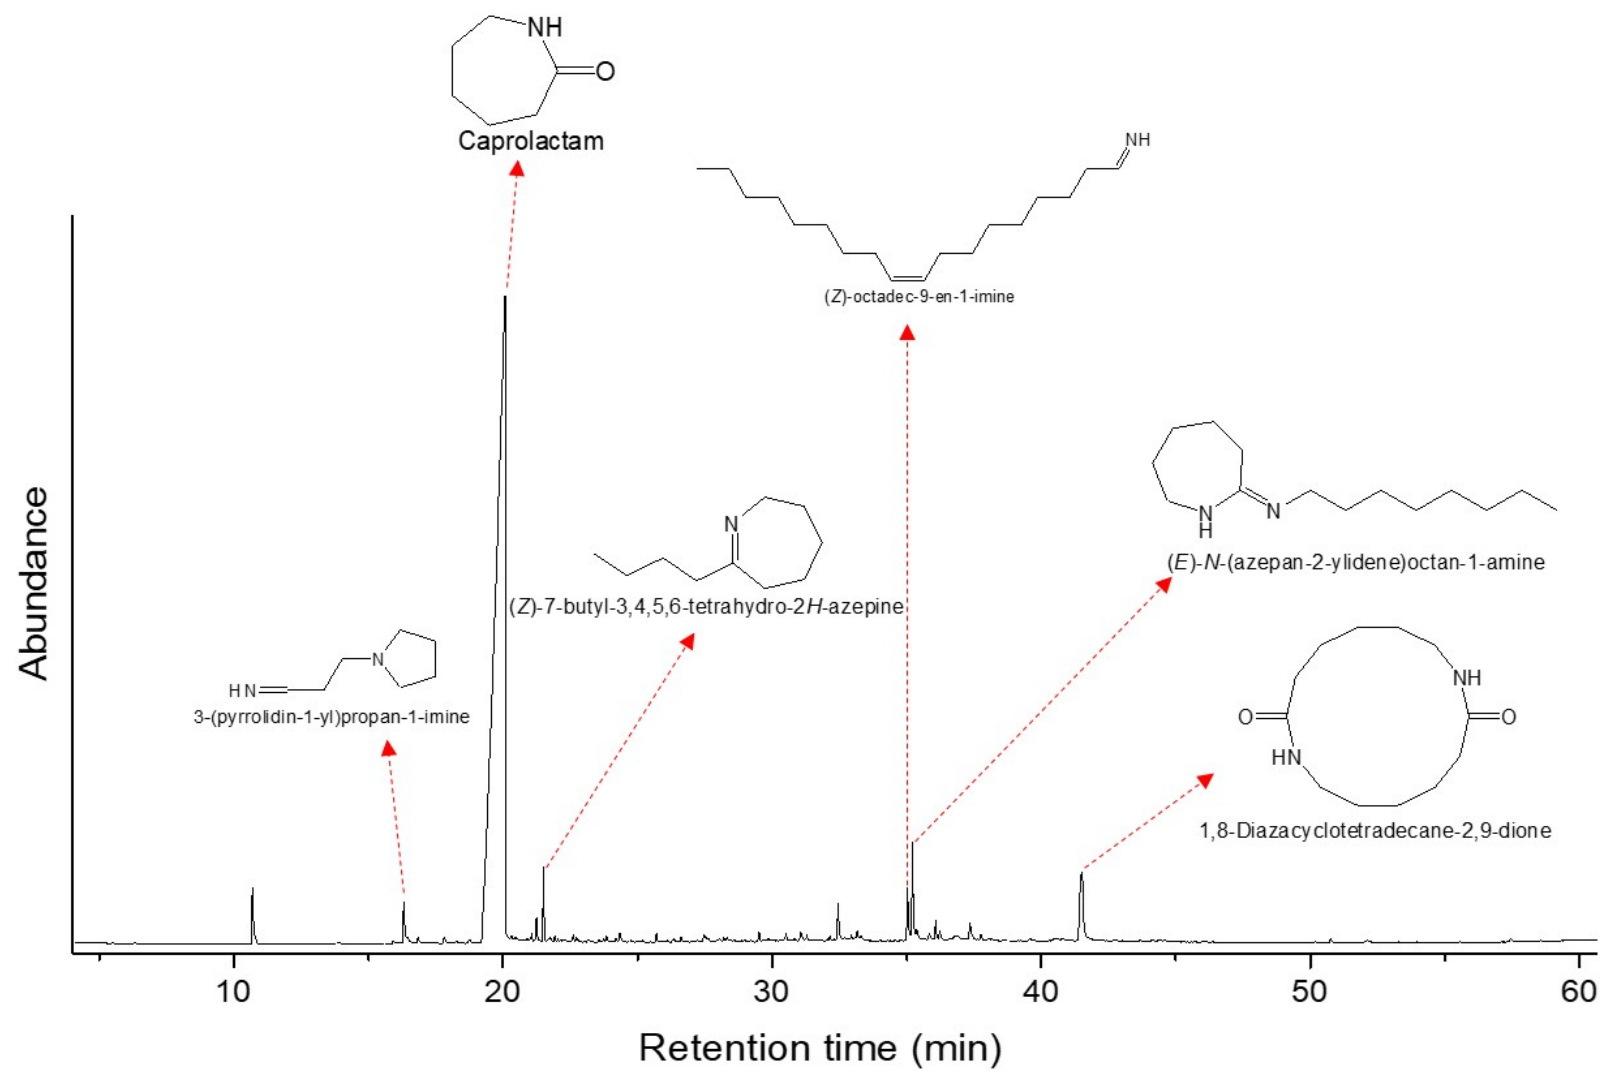

**Figure S4.** A representative GC-MS chromatogram of the liquid product produced via thermocatalytic conversion of the fishing net waste.

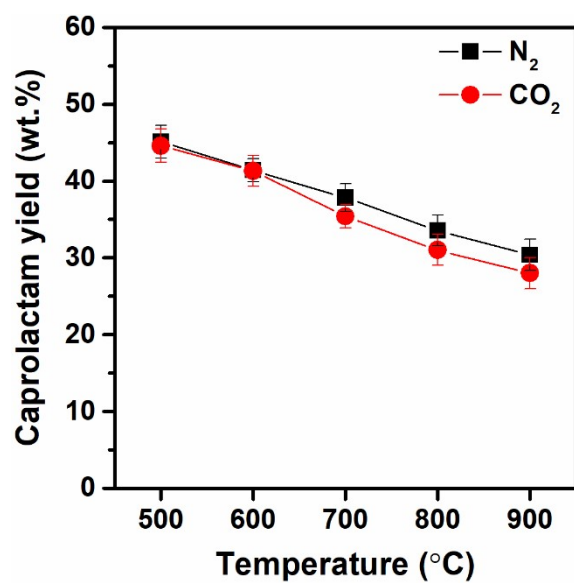

**Figure S5.** Yield of caprolactam (on the basis of weight of the feedstock) produced from non-catalytic thermal conversion of the fishing net waste under N<sub>2</sub> and CO<sub>2</sub> environments as a function of temperature.

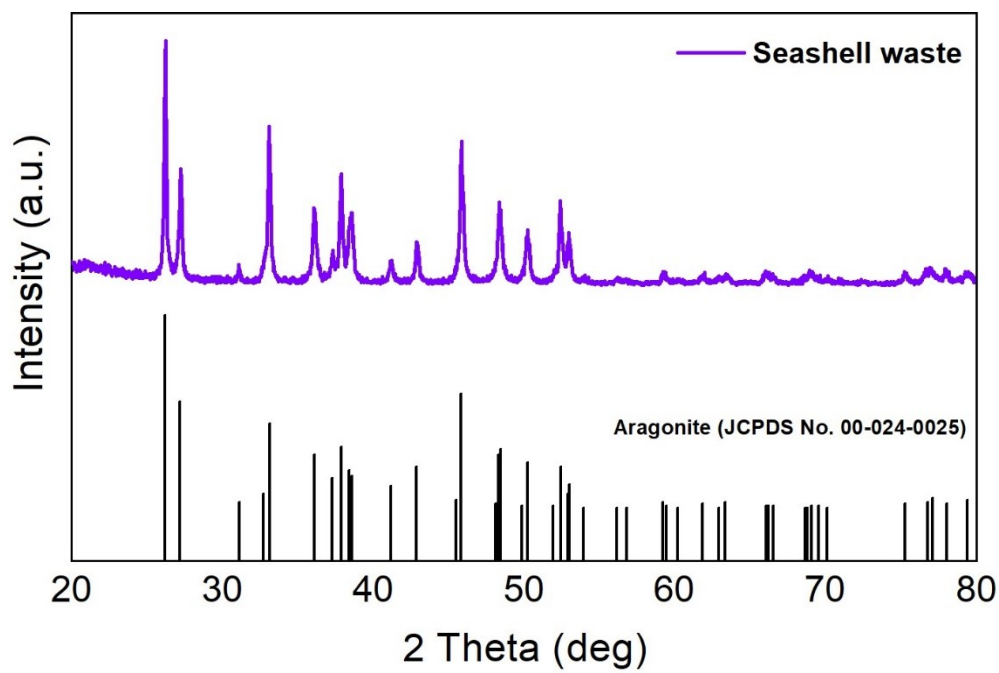

**Figure S6.** XRD pattern of seashell waste.

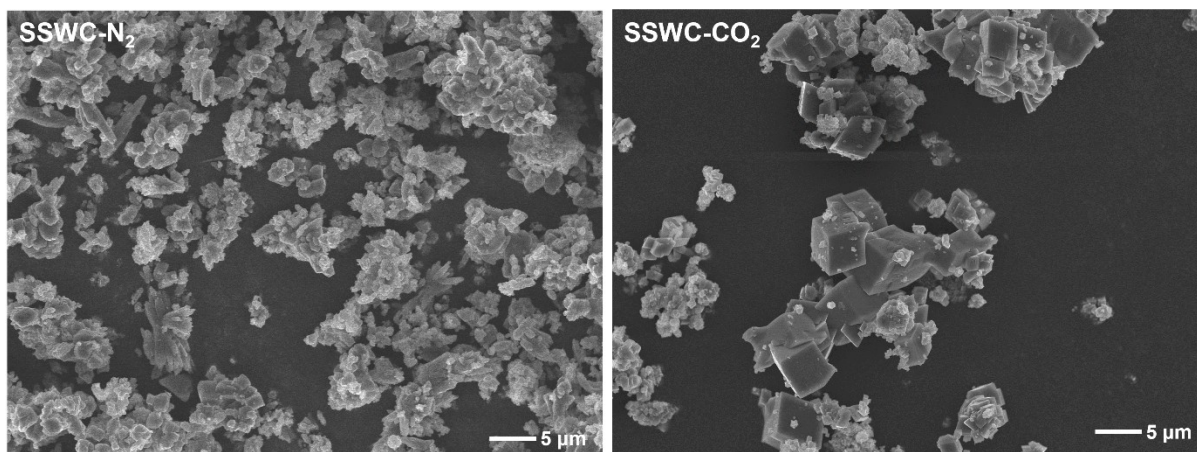

**Figure S7.** Scanning electron microscopy (SEM) images of SSWC-N<sub>2</sub> and SSWC-CO<sub>2</sub> with a magnification of 5 μm.



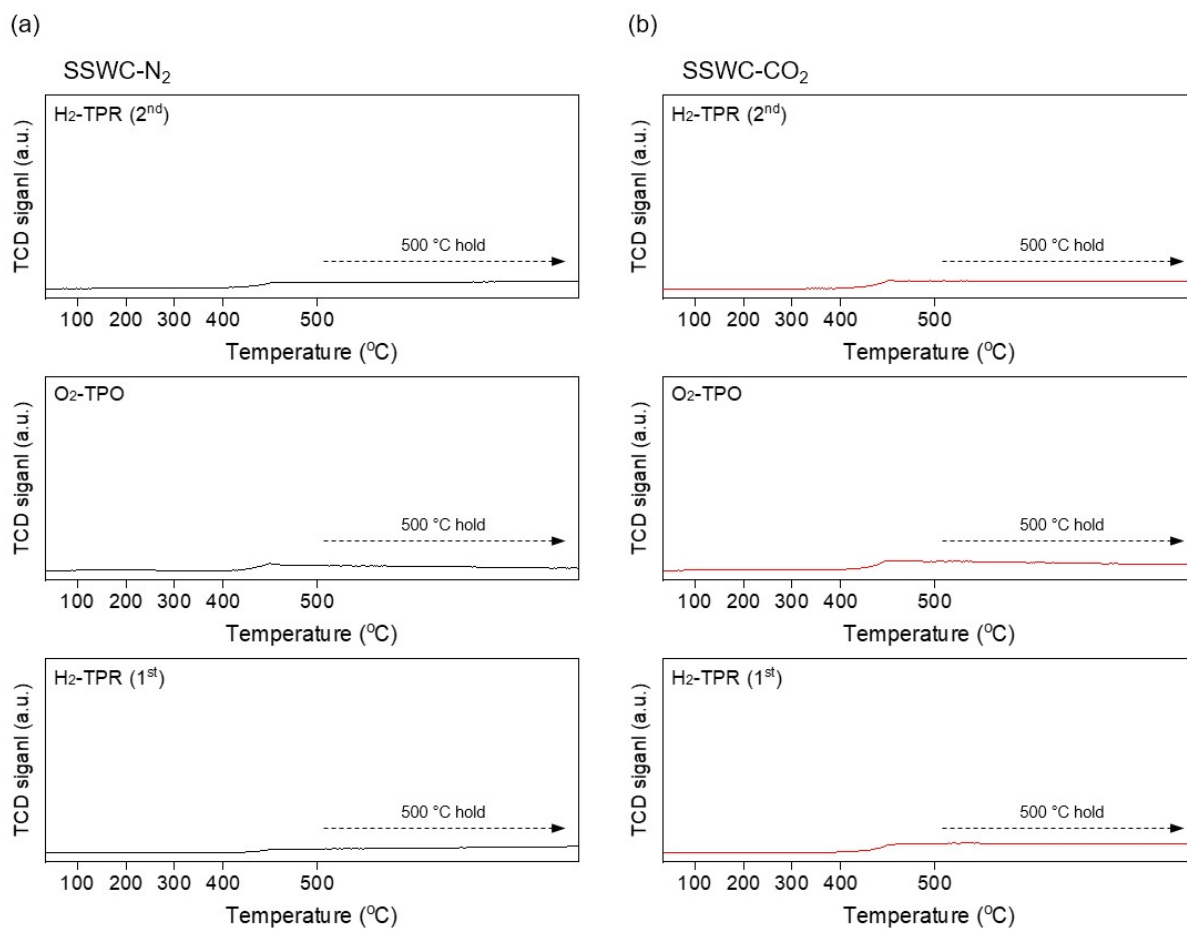

**Figure S8.** The sequence analysis of H<sub>2</sub>-TPR, O<sub>2</sub>-TPO, and H<sub>2</sub>-TPR for (a) SSWC-N<sub>2</sub> and (b) SSWC-CO<sub>2</sub> catalysts.

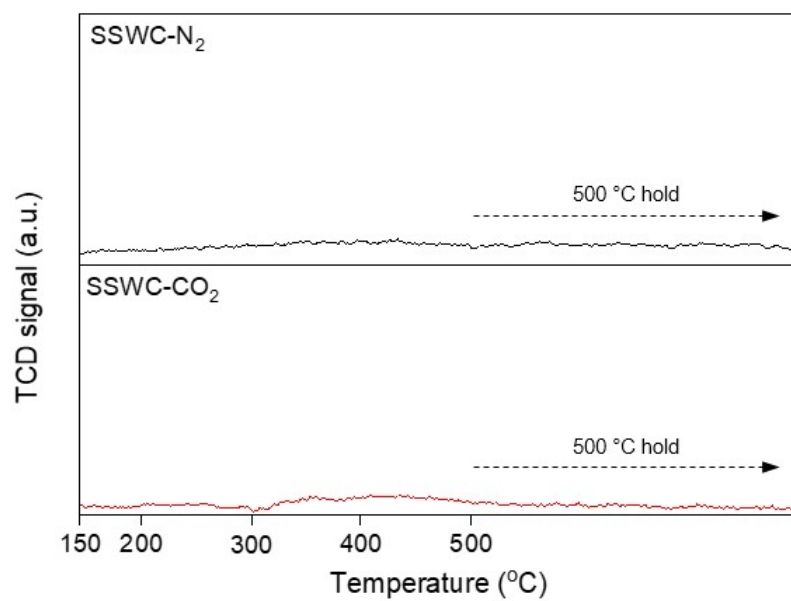

**Figure S9.** NH<sub>3</sub>-TPD profiles of the SSWC-N<sub>2</sub> and SSWC-CO<sub>2</sub> catalysts.

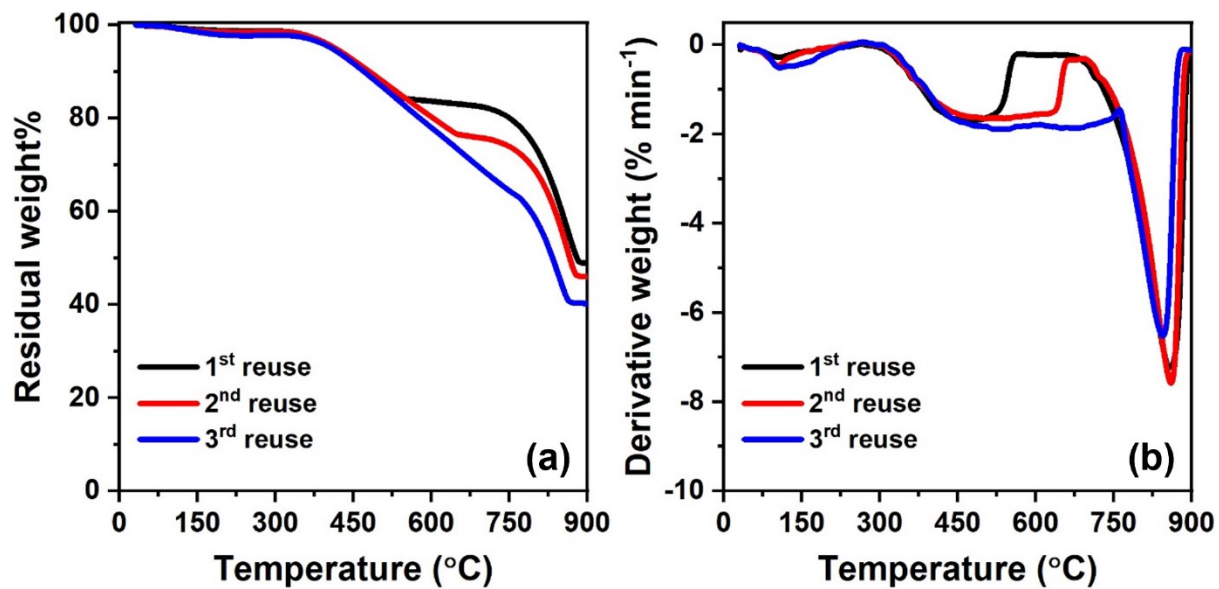

**Figure S10.** Thermogravimetric analysis of spent SSWC-CO<sub>2</sub> catalyst in air: (a) residual mass change in terms of temperature; and (b) derivative weight variation in terms of temperature.

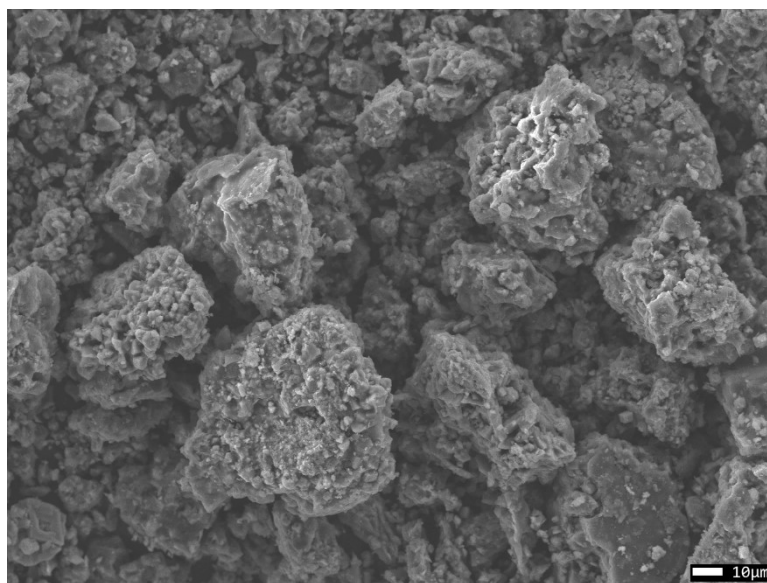

**Figure S11.** SEM image of the spent SSWC-CO<sub>2</sub> after 3<sup>rd</sup> reuse.

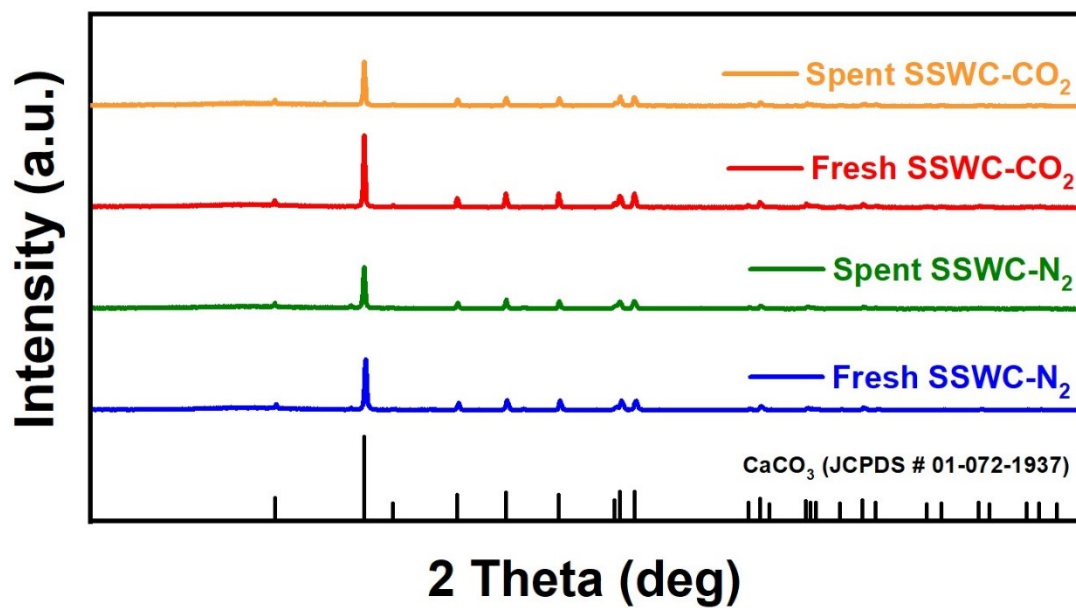

**Figure S12.** XRD patterns of fresh and spent SSWC-N<sub>2</sub> and fresh and spent SSWC-CO<sub>2</sub> catalysts.

**Table S1.** Specification, column information, and analytical conditions for the micro-GC.

| Conditions          |                      | Module A                  | Module B                   |
|---------------------|----------------------|---------------------------|----------------------------|
| Column              |                      | Rt-Molsieve 5A            | Rt-Q-Bond                  |
| Sample Pump setting | Sample pump mode     | Continuous                | Continuous                 |
|                     | Sample pump time     | 20 s                      | 20 s                       |
| Column setting      | Carrier gas          | Argon ( $\geq 99.999\%$ ) | Helium ( $\geq 99.999\%$ ) |
|                     | Column pressure      | 20 psi                    | 17 psi                     |
|                     | Initial temperature  | 50 °C (40 s)              | 50 °C (30 s)               |
|                     | Ramping time         | 50 s                      | 60 s                       |
|                     | Final temperature    | 100 °C (40 s)             | 110 °C (40 s)              |
|                     | Total analysis time  | 130 s                     | 130 s                      |
| Injector setting    | Inject time          | 30 ms                     | 30 ms                      |
|                     | Injector temperature | 90 °C                     | 90 °C                      |
| TCD setting         | TCD temperature      | 70 °C                     | 70 °C                      |
|                     | Data rate            | 50 Hz                     | 50 Hz                      |

**Table S2.** Specification, column information, and analytical conditions for the GC-MS.

| Column           | HP-5MS Ultra Inlet column (0.25 mm × 0.25 μm × 30 m) |                          |
|------------------|------------------------------------------------------|--------------------------|
| Oven setting     | Initial temperature                                  | 40 °C (1 min)            |
|                  | Ramping                                              | 3 °C min <sup>-1</sup>   |
|                  | Final temperature                                    | 280 °C (19 min)          |
|                  | Total analysis time                                  | 100 min                  |
| Column setting   | Carrier gas                                          | Helium (≥99.999%)        |
|                  | Carrier gas flow                                     | 1.5 mL min <sup>-1</sup> |
|                  | Column flow                                          | 1 mL min <sup>-1</sup>   |
| Injector setting | Injection mode                                       | Splitless                |
|                  | Injection volume                                     | 1 μL                     |
|                  | Injection temperature                                | 275 °C                   |
| MS setting       | Aux temperature                                      | 300 °C                   |
|                  | m/z range                                            | 50~500 amu               |

**Table S3.** Information of byproducts identified in the liquid product produced via thermocatalytic conversion of the fishing net waste.

| Chemical species                                           | Chemical formula                                              | MW     | Chemical structure |
|------------------------------------------------------------|---------------------------------------------------------------|--------|--------------------|
| <i>Azepines</i>                                            |                                                               |        |                    |
| 7-butyl-3,4,5,6(2 <i>H</i> )-tetrahydroazepine             | C <sub>10</sub> H <sub>19</sub> N                             | 153.26 |                    |
| ( <i>E</i> )- <i>N</i> -(azepan-2-ylidene)octan-1-amine    | C <sub>14</sub> H <sub>28</sub> N <sub>2</sub>                | 224.39 |                    |
| 1-(3,4,5,6-tetrahydro-2 <i>H</i> -azepin-7-yl)-2-azepanone | C <sub>12</sub> H <sub>20</sub> N <sub>2</sub> O              | 208.30 |                    |
| <i>Imines</i>                                              |                                                               |        |                    |
| 2-methyl-6-tridecyl-6-piperidine                           | C <sub>19</sub> H <sub>37</sub> N                             | 279.50 |                    |
| ( <i>Z</i> )-octadec-9-en-1-imine                          | C <sub>18</sub> H <sub>35</sub> N                             | 265.48 |                    |
| 3-(pyrrolidin-1-yl)propan-1-imine                          | C <sub>7</sub> H <sub>14</sub> N <sub>2</sub>                 | 126.20 |                    |
| <i>Cyclic dimers</i>                                       |                                                               |        |                    |
| 1,8-diazacyclotetradecane-2,9-dione                        | C <sub>12</sub> H <sub>22</sub> N <sub>2</sub> O <sub>2</sub> | 226.32 |                    |
| 1,6,14-triazacycloheneicosane-2,7,15-trione                | C <sub>18</sub> H <sub>33</sub> N <sub>3</sub> O <sub>3</sub> | 339.47 |                    |



**Table S4.** Composition of the SSWC-N<sub>2</sub> and SSWC-CO<sub>2</sub> catalysts (unit: wt.%).

| Constituent       | SSWC-N <sub>2</sub> | SSWC-CO <sub>2</sub> |
|-------------------|---------------------|----------------------|
| CaCO <sub>3</sub> | 89.9                | 96.3                 |
| Ba                | 0.0017              | 0.0018               |
| Cr                | 0.0014              | 0.0152               |
| Cu                | 0.0002              | 0.0004               |
| Fe                | 0.0084              | 0.0474               |
| K                 | 8.96                | 2.0                  |
| Li                | 0.00009             | 0.00017              |
| Mg                | 0.0113              | 0.0106               |
| Mn                | 0.00027             | 0.0006               |
| Na                | 0.14                | 0.11                 |
| Ni                | 0.00098             | 0.0138               |
| P                 | 0.0506              | 0.0233               |
| Sr                | 0.0968              | 0.10                 |
| Si                | 0.0434              | 0.0506               |
| Zn                | 0.00018             | 0.00026              |

**Table S5.** Comparison of caprolactam yields obtained from fishing nets via thermocatalytic processes with different catalysts.

| Feedstock          | Catalyst                                                                       | Reaction conditions                                                                           | Caprolactam yield (wt.%) | Ref.      |
|--------------------|--------------------------------------------------------------------------------|-----------------------------------------------------------------------------------------------|--------------------------|-----------|
| Fishing net        | ZSM-5                                                                          | N <sub>2</sub> environment; $T = 342\text{--}476$ °C; catalyst/feed = 0.2 (w/w)               | 83 (GC-MS area%)         | <u>1</u>  |
| Fishing net        | Scallop shell calcined under air                                               | He environment; $T = 410$ °C; catalyst/feed = 5 (w/w); residence time = 2 min                 | 66                       | <u>2</u>  |
| Commercial nylon 6 | Scallop shell calcined under air                                               | He environment; $T = 410$ °C; catalyst/feed = 5 (w/w); residence time = 2 min                 | 70                       | <u>2</u>  |
| Fishing net waste  | Seashell waste-derived catalysts under CO <sub>2</sub> (SSWC-CO <sub>2</sub> ) | CO <sub>2</sub> environment; $T = 500$ °C; catalyst/feed = 0.05 (w/w); residence time = 1 min | 80                       | This work |

**Table S6.** Data used for estimating microplastic release from ghost net and the value of caprolactam made via the thermocatalytic upcycling process of ghost net.

| Data                                                       | Value                                    | Ref.               |
|------------------------------------------------------------|------------------------------------------|--------------------|
| The amount of ghost nets                                   | 640,000 metric tons per year             | <a href="#">3</a>  |
| Release of microplastic from fishing gear abandoned at sea | 1277 microplastic pieces m <sup>-1</sup> | <a href="#">4</a>  |
| Contribution of ghost net to microplastic release          | 49%                                      | <a href="#">4</a>  |
| Density of ghost net                                       | 0.00057 g cm <sup>-1</sup>               | Measured ourselves |
| Caprolactam market price (as of January 16, 2022)          | CFR 2,020 USD per ton                    | <a href="#">5</a>  |

## References

1. J. Eimontas, S. Yousef, N. Striūgas and M. A. Abdelnaby, *Renew. Energ.*, 2021, **179**, 1385-1403.
2. N. Chaihad, I. Kurnia, A. Yoshida, C. Watanabe, K. Tei, P. Reubroycharoen, Y. Kasai, A. Abudula and G. Guan, *J. Anal. Appl. Pyrolysis*, 2020, **146**, 104750.
3. M. Charter, R. Carruthers and S. F. Jensen, *Products from waste fishing nets*, Circular Ocean led by the Environmental Research Institute, Scotland, 2018.
4. L. S. Wright, I. E. Napper and R. C. Thompson, *Mar. Pollut. Bull.*, 2021, **173**, 113115.
5. Caprolactam (CPL) price,  
[https://www.echemi.com/productsInformation/pid\\_Seven1952-caprolactam-cpl.html](https://www.echemi.com/productsInformation/pid_Seven1952-caprolactam-cpl.html),  
(accessed January 16, 2022).
